# Supplementary material for: LC-MS Profiling of Kakkonto and Identification of Ephedrine as a Key Component for Its Anti-Glycation Activity
Source: MDPI journal article supplement (doi:10.3390/molecules28114409), 2023-05-29
Supplement: s1 [file s1]

## *Supporting Information*

# **LC-MS Profiling of Kakkonto and Identification of Ephedrine as a Key Component for Its Anti-Glycation Activity**

**Kaori Ito, Takashi Kikuchi \*, Kanako Ikube, Kouharu Otsuki, Kazuo Koike and Wei Li \***

Faculty of Pharmaceutical Sciences, Toho University, Miyama 2-2-1,  
Funabashi 274-8510, Chiba, Japan

\* Correspondence: takashi.kikuchi@phar.toho-u.ac.jp (T.K.);  
liwei@phar.toho-u.ac.jp (W.L.)

**Table S1. Mass and MS/MS spectrometric data of compounds identified in Kakkonto extract.**

**Table S2. Mass spectrometric data of products detected in Kakkonto extract reacted with glyceraldehyde (GA).**

**Table S3. Mass spectrometric data of products detected in Kakkonto extract reacted with methylglyoxal (MGO).**

**Table S1.** Mass and MS/MS spectrometric data of compounds identified in Kakkonto extract.

| No. | t <sub>R</sub><br>(min) | Molecular<br>formula                            | Positive ion mode                  |                    |                                                                                                                                                                                                                                                                                                                                                                                                                                                                                   |                                                                                                                                                                                                                                                                                                                                                                                                                                                                                                                                                                                                                                                                                                                                                                      | Negative ion mode               |                    | Identification                                                                                                                                                                                           | Source             |                                                                  |
|-----|-------------------------|-------------------------------------------------|------------------------------------|--------------------|-----------------------------------------------------------------------------------------------------------------------------------------------------------------------------------------------------------------------------------------------------------------------------------------------------------------------------------------------------------------------------------------------------------------------------------------------------------------------------------|----------------------------------------------------------------------------------------------------------------------------------------------------------------------------------------------------------------------------------------------------------------------------------------------------------------------------------------------------------------------------------------------------------------------------------------------------------------------------------------------------------------------------------------------------------------------------------------------------------------------------------------------------------------------------------------------------------------------------------------------------------------------|---------------------------------|--------------------|----------------------------------------------------------------------------------------------------------------------------------------------------------------------------------------------------------|--------------------|------------------------------------------------------------------|
|     |                         |                                                 | MS                                 |                    | MS <sup>2</sup> (NCE 10 eV)                                                                                                                                                                                                                                                                                                                                                                                                                                                       | MS <sup>2</sup> (stepped NCE 10, 25,<br>and 40 eV)                                                                                                                                                                                                                                                                                                                                                                                                                                                                                                                                                                                                                                                                                                                   | MS                              |                    |                                                                                                                                                                                                          |                    | MS <sup>2</sup> (stepped NCE 10, 25,<br>40 eV)                   |
|     |                         |                                                 | Detected<br>mass<br>( <i>m/z</i> ) |                    | Detected<br>mass <i>m/z</i><br>(Intensity, molecular<br>formula)                                                                                                                                                                                                                                                                                                                                                                                                                  | Detected<br>mass <i>m/z</i> (Intensity,<br>molecular formula)                                                                                                                                                                                                                                                                                                                                                                                                                                                                                                                                                                                                                                                                                                        | Detected<br>mass ( <i>m/z</i> ) |                    |                                                                                                                                                                                                          |                    | Detected<br>mass <i>m/z</i><br>(Intensity, molecular<br>formula) |
| 1   | 1.92                    | C <sub>10</sub> H <sub>15</sub> ON              | 166.1227                           | [M+H] <sup>+</sup> | 148.1120 (100, C <sub>10</sub> H <sub>14</sub> N)<br>117.0701 (1.9, C <sub>9</sub> H <sub>9</sub> )                                                                                                                                                                                                                                                                                                                                                                               | 148.1119 (100, C <sub>10</sub> H <sub>14</sub> N)<br>117.0701 (4.0, C <sub>9</sub> H <sub>9</sub> )                                                                                                                                                                                                                                                                                                                                                                                                                                                                                                                                                                                                                                                                  | no detection                    |                    | Ephedrine                                                                                                                                                                                                | E                  |                                                                  |
| 2   | 2.32                    | C <sub>11</sub> H <sub>17</sub> ON              | 180.1383                           | [M+H] <sup>+</sup> | 180.1382 (100, C <sub>11</sub> H <sub>18</sub> ON)<br>162.1276 (88.8, C <sub>11</sub> H <sub>16</sub> N)<br>135.0804 (10.4, C <sub>9</sub> H <sub>11</sub> O)<br>117.0700 (2.4, C <sub>9</sub> H <sub>9</sub> )                                                                                                                                                                                                                                                                   | 162.1277 (100, C <sub>11</sub> H <sub>16</sub> N)<br>135.0804 (14.3, C <sub>9</sub> H <sub>11</sub> O)<br>117.0701 (5.6, C <sub>9</sub> H <sub>9</sub> )                                                                                                                                                                                                                                                                                                                                                                                                                                                                                                                                                                                                             | no detection                    |                    | Methylephedrine                                                                                                                                                                                          | E                  |                                                                  |
| 3   | 3.51                    | C <sub>21</sub> H <sub>20</sub> O <sub>10</sub> | 433.1127                           | [M+H] <sup>+</sup> | 433.1125 (100, C <sub>21</sub> H <sub>21</sub> O <sub>10</sub> )<br>415.1022 (1.9, C <sub>21</sub> H <sub>19</sub> O <sub>9</sub> )<br>397.0922 (0.2, C <sub>21</sub> H <sub>17</sub> O <sub>8</sub> )<br>367.0809 (0.4, C <sub>20</sub> H <sub>15</sub> O <sub>7</sub> )<br>313.0704 (0.8, C <sub>17</sub> H <sub>13</sub> O <sub>6</sub> )                                                                                                                                      | 433.1126 (100, C <sub>21</sub> H <sub>21</sub> O <sub>10</sub> )<br>415.1018 (15.9, C <sub>21</sub> H <sub>19</sub> O <sub>9</sub> )<br>397.0912 (17.3, C <sub>21</sub> H <sub>17</sub> O <sub>8</sub> )<br>379.0806 (8.9, C <sub>21</sub> H <sub>15</sub> O <sub>7</sub> )<br>367.0807 (11.1, C <sub>20</sub> H <sub>15</sub> O <sub>7</sub> )<br>337.0701 (12.6, C <sub>19</sub> H <sub>13</sub> O <sub>6</sub> )<br>313.0703 (51.9, C <sub>17</sub> H <sub>13</sub> O <sub>6</sub> )<br>283.0601 (19.6, C <sub>16</sub> H <sub>11</sub> O <sub>5</sub> )                                                                                                                                                                                                          | 431.0980                        | [M−H] <sup>−</sup> | 431.0984 (100, C <sub>21</sub> H <sub>19</sub> O <sub>10</sub> )<br>311.0563 (80.1, C <sub>17</sub> H <sub>11</sub> O <sub>6</sub> )<br>283.0613 (53.9, C <sub>16</sub> H <sub>11</sub> O <sub>5</sub> ) | 3'-hydroxypuerarin | PU                                                               |
| 4   | 5.52                    | C <sub>21</sub> H <sub>20</sub> O <sub>9</sub>  | 417.1176                           | [M+H] <sup>+</sup> | 417.1174 (100, C <sub>21</sub> H <sub>21</sub> O <sub>9</sub> )<br>399.1071 (2.4, C <sub>21</sub> H <sub>19</sub> O <sub>8</sub> )<br>381.0962 (0.5, C <sub>21</sub> H <sub>17</sub> O <sub>7</sub> )<br>351.0868 (0.4, C <sub>20</sub> H <sub>15</sub> O <sub>6</sub> )<br>321.0761 (0.3, C <sub>19</sub> H <sub>13</sub> O <sub>5</sub> )<br>297.0754 (1.6, C <sub>17</sub> H <sub>13</sub> O <sub>4</sub> )<br>257.0809 (0.9, C <sub>15</sub> H <sub>13</sub> O <sub>4</sub> ) | 417.1173 (100, C <sub>21</sub> H <sub>21</sub> O <sub>9</sub> )<br>399.1071 (18.2, C <sub>21</sub> H <sub>19</sub> O <sub>8</sub> )<br>381.0965 (4.5, C <sub>21</sub> H <sub>17</sub> O <sub>7</sub> )<br>363.0858 (10.2, C <sub>21</sub> H <sub>15</sub> O <sub>6</sub> )<br>351.0859 (11.6, C <sub>20</sub> H <sub>15</sub> O <sub>6</sub> )<br>335.0908 (4.8, C <sub>20</sub> H <sub>15</sub> O <sub>5</sub> )<br>321.0754 (12.8, C <sub>19</sub> H <sub>13</sub> O <sub>5</sub> )<br>297.0755 (50.3, C <sub>17</sub> H <sub>13</sub> O <sub>5</sub> )<br>281.0808 (3.0, C <sub>17</sub> H <sub>13</sub> O <sub>4</sub> )<br>267.0650 (18.5, C <sub>16</sub> H <sub>11</sub> O <sub>4</sub> )<br>257.0805 (26.4, C <sub>15</sub> H <sub>13</sub> O <sub>4</sub> ) | 415.1031                        | [M−H] <sup>−</sup> | 415.1037 (100, C <sub>21</sub> H <sub>19</sub> O <sub>9</sub> )<br>295.0612 (79.6, C <sub>17</sub> H <sub>11</sub> O <sub>5</sub> )<br>267.0665 (58.9, C <sub>16</sub> H <sub>11</sub> O <sub>4</sub> )  | Puerarin           | PU                                                               |

|    |      |                                                 |          |                                   |                                                                                                                                                                                                                                                                                                                                                                                                                                                                                      |                                                                                                                                                                                                                                                                                                                                                                                                                                                                                                                                                                                                                                                                                                                                                                       |          |                       |                                                                                                                                                                                                                                                                                                                                           |                    |         |
|----|------|-------------------------------------------------|----------|-----------------------------------|--------------------------------------------------------------------------------------------------------------------------------------------------------------------------------------------------------------------------------------------------------------------------------------------------------------------------------------------------------------------------------------------------------------------------------------------------------------------------------------|-----------------------------------------------------------------------------------------------------------------------------------------------------------------------------------------------------------------------------------------------------------------------------------------------------------------------------------------------------------------------------------------------------------------------------------------------------------------------------------------------------------------------------------------------------------------------------------------------------------------------------------------------------------------------------------------------------------------------------------------------------------------------|----------|-----------------------|-------------------------------------------------------------------------------------------------------------------------------------------------------------------------------------------------------------------------------------------------------------------------------------------------------------------------------------------|--------------------|---------|
| 5  | 5.76 | C <sub>23</sub> H <sub>28</sub> O <sub>11</sub> | 481.1699 | [M+H] <sup>+</sup>                | 319.1173 (84.0, C <sub>17</sub> H <sub>19</sub> O <sub>6</sub> )<br>301.1068 (18.9, C <sub>17</sub> H <sub>17</sub> O <sub>5</sub> )<br>197.0808 (100, C <sub>10</sub> H <sub>13</sub> O <sub>4</sub> )<br>179.0701 (2.1, C <sub>10</sub> H <sub>11</sub> O <sub>3</sub> )<br>151.0753 (3.6, C <sub>9</sub> H <sub>11</sub> O <sub>2</sub> )<br>105.0339 (32.2, C <sub>7</sub> H <sub>5</sub> O)                                                                                     | 319.1172 (23.8, C <sub>17</sub> H <sub>19</sub> O <sub>6</sub> )<br>197.0807 (49.8, C <sub>10</sub> H <sub>13</sub> O <sub>4</sub> )<br>179.0701 (6.6, C <sub>10</sub> H <sub>11</sub> O <sub>3</sub> )<br>151.0753 (19.2, C <sub>9</sub> H <sub>11</sub> O <sub>2</sub> )<br>133.0648 (19.6, C <sub>9</sub> H <sub>9</sub> O)<br>105.0338 (100, C <sub>7</sub> H <sub>5</sub> O)                                                                                                                                                                                                                                                                                                                                                                                     | 525.1611 | [M+HCOO] <sup>-</sup> | 479.1563 (13.7, C <sub>23</sub> H <sub>27</sub> O <sub>11</sub> )<br>121.0294 (100, C <sub>7</sub> H <sub>5</sub> O <sub>2</sub> )                                                                                                                                                                                                        | Albiflorin         | PA      |
| 6  | 6.10 | C <sub>22</sub> H <sub>22</sub> O <sub>10</sub> | 447.1282 | [M+H] <sup>+</sup>                | 447.1280 (100, C <sub>22</sub> H <sub>23</sub> O <sub>10</sub> )<br>429.1170 (1.4, C <sub>22</sub> H <sub>21</sub> O <sub>9</sub> )<br>411.1067 (0.4, C <sub>22</sub> H <sub>19</sub> O <sub>8</sub> )<br>381.0955 (0.3, C <sub>21</sub> H <sub>17</sub> O <sub>7</sub> )<br>327.0858 (0.6, C <sub>18</sub> H <sub>15</sub> O <sub>6</sub> )                                                                                                                                         | 447.1280 (100, C <sub>22</sub> H <sub>23</sub> O <sub>10</sub> )<br>429.1174 (19.8, C <sub>22</sub> H <sub>21</sub> O <sub>9</sub> )<br>411.1068 (18.3, C <sub>22</sub> H <sub>19</sub> O <sub>8</sub> )<br>393.0963 (10.2, C <sub>22</sub> H <sub>17</sub> O <sub>7</sub> )<br>381.0962 (11.8, C <sub>21</sub> H <sub>17</sub> O <sub>7</sub> )<br>365.1011 (5.5, C <sub>21</sub> H <sub>17</sub> O <sub>6</sub> )<br>357.0962 (3.8, C <sub>19</sub> H <sub>17</sub> O <sub>7</sub> )<br>351.0856 (12.0, C <sub>20</sub> H <sub>15</sub> O <sub>6</sub> )<br>337.1063 (7.3, C <sub>20</sub> H <sub>17</sub> O <sub>5</sub> )<br>327.0859 (53.8, C <sub>18</sub> H <sub>15</sub> O <sub>6</sub> )<br>297.0755 (20.1, C <sub>17</sub> H <sub>11</sub> O <sub>5</sub> ) | 445.1137 | [M-H] <sup>-</sup>    | 445.1142(100, C <sub>22</sub> H <sub>21</sub> O <sub>10</sub> )<br>325.0719 (82.5, C <sub>18</sub> H <sub>13</sub> O <sub>6</sub> )<br>297.0770 (19.4, C <sub>17</sub> H <sub>13</sub> O <sub>5</sub> )                                                                                                                                   | 3'-Methoxypuerarin | PU      |
| 7  | 6.35 | C <sub>26</sub> H <sub>28</sub> O <sub>13</sub> | 549.1600 | [M+H] <sup>+</sup>                | 549.1597 (100, C <sub>28</sub> H <sub>29</sub> O <sub>13</sub> )<br>417.1171 (5.7, C <sub>21</sub> H <sub>21</sub> O <sub>9</sub> )<br>399.1067 (0.3, C <sub>21</sub> H <sub>19</sub> O <sub>8</sub> )<br>297.0753 (0.4, C <sub>17</sub> H <sub>13</sub> O <sub>5</sub> )                                                                                                                                                                                                            | 549.1594 (100, C <sub>26</sub> H <sub>29</sub> O <sub>13</sub> )<br>417.1171 (60.1, C <sub>21</sub> H <sub>21</sub> O <sub>9</sub> )<br>399.1067 (26.7, C <sub>21</sub> H <sub>19</sub> O <sub>8</sub> )<br>381.0961 (20.8, C <sub>21</sub> H <sub>17</sub> O <sub>7</sub> )<br>351.0856 (13.5, C <sub>20</sub> H <sub>15</sub> O <sub>6</sub> )<br>335.0907 (6.4, C <sub>20</sub> H <sub>15</sub> O <sub>5</sub> )<br>321.0751 (14.7, C <sub>19</sub> H <sub>13</sub> O <sub>5</sub> )<br>297.0753 (62.7, C <sub>17</sub> H <sub>13</sub> O <sub>5</sub> )<br>267.0649 (14.8, C <sub>16</sub> H <sub>11</sub> O <sub>4</sub> )                                                                                                                                       | 547.1458 | [M-H] <sup>-</sup>    | 295.0612 (100, C <sub>17</sub> H <sub>11</sub> O <sub>5</sub> )<br>267.0663 (53.3, C <sub>16</sub> H <sub>11</sub> O <sub>4</sub> )                                                                                                                                                                                                       | Puerarin apioside  | PU      |
| 8  | 6.57 | C <sub>23</sub> H <sub>28</sub> O <sub>11</sub> | 498.1966 | [M+NH <sub>4</sub> ] <sup>+</sup> | 463.1595 (6.0, C <sub>23</sub> H <sub>27</sub> O <sub>10</sub> )<br>341.1224 (0.8, C <sub>16</sub> H <sub>21</sub> O <sub>8</sub> )<br>319.1175 (3.3, C <sub>17</sub> H <sub>19</sub> O <sub>6</sub> )<br>301.1069 (13.5, C <sub>17</sub> H <sub>17</sub> O <sub>5</sub> )<br>285.0966 (2.5, C <sub>13</sub> H <sub>17</sub> O <sub>7</sub> )<br>197.0808 (25.2, C <sub>10</sub> H <sub>13</sub> O <sub>4</sub> )<br>179.0701 (100, C <sub>10</sub> H <sub>11</sub> O <sub>3</sub> ) | 197.0807 (9.4, C <sub>10</sub> H <sub>13</sub> O <sub>4</sub> )<br>179.0701 (100, C <sub>10</sub> H <sub>11</sub> O <sub>3</sub> )<br>151.0753 (26.7, C <sub>9</sub> H <sub>11</sub> O <sub>2</sub> )                                                                                                                                                                                                                                                                                                                                                                                                                                                                                                                                                                 | 525.1613 | [M+HCOO] <sup>-</sup> | 479.1558 (4.1, C <sub>23</sub> H <sub>27</sub> O <sub>11</sub> )<br>449.1457 (0.5, C <sub>22</sub> H <sub>25</sub> O <sub>10</sub> )<br>327.1088 (8.2, C <sub>15</sub> H <sub>19</sub> O <sub>8</sub> )<br>165.0556 (9.5, C <sub>9</sub> H <sub>9</sub> O <sub>3</sub> )<br>121.0294 (100, C <sub>7</sub> H <sub>5</sub> O <sub>2</sub> ) | Paeoniflorin       | PA      |
| 9  | 7.20 | C <sub>21</sub> H <sub>20</sub> O <sub>9</sub>  | 417.1175 | [M+H] <sup>+</sup>                | 255.0650 (100, C <sub>15</sub> H <sub>11</sub> O <sub>4</sub> )                                                                                                                                                                                                                                                                                                                                                                                                                      | 255.0648 (100, C <sub>15</sub> H <sub>11</sub> O <sub>4</sub> )                                                                                                                                                                                                                                                                                                                                                                                                                                                                                                                                                                                                                                                                                                       | 461.1089 | [M+HCOO] <sup>-</sup> | 415.1037 (34.6, C <sub>21</sub> H <sub>19</sub> O <sub>9</sub> )<br>253.0507 (100, C <sub>16</sub> H <sub>9</sub> O <sub>4</sub> )                                                                                                                                                                                                        | Daidzin            | PU<br>G |
| 10 | 7.68 | C <sub>22</sub> H <sub>22</sub> O <sub>10</sub> | 447.1284 | [M+H] <sup>+</sup>                | 285.0755 (100, C <sub>16</sub> H <sub>13</sub> O <sub>5</sub> )                                                                                                                                                                                                                                                                                                                                                                                                                      | 285.0755 (100, C <sub>16</sub> H <sub>13</sub> O <sub>5</sub> )                                                                                                                                                                                                                                                                                                                                                                                                                                                                                                                                                                                                                                                                                                       | 491.1199 | [M+HCOO] <sup>-</sup> | 445.1145 (31.2, C <sub>22</sub> H <sub>21</sub> O <sub>10</sub> )<br>283.0613 (100, C <sub>16</sub> H <sub>11</sub> O <sub>5</sub> )                                                                                                                                                                                                      | Glycitin           | PU      |

|    |      |                                                 |          |                                   |                                                                                                                                                                                                                                                                                                                                                  |                                                                                                                                                                                                                                                                                                                                                                                                                                                                                                                                                                                                                                                                                                                                                                        |          |                    |                                                                                                                                                                                                                                                                                                                                                                                                                    |                                                                |    |
|----|------|-------------------------------------------------|----------|-----------------------------------|--------------------------------------------------------------------------------------------------------------------------------------------------------------------------------------------------------------------------------------------------------------------------------------------------------------------------------------------------|------------------------------------------------------------------------------------------------------------------------------------------------------------------------------------------------------------------------------------------------------------------------------------------------------------------------------------------------------------------------------------------------------------------------------------------------------------------------------------------------------------------------------------------------------------------------------------------------------------------------------------------------------------------------------------------------------------------------------------------------------------------------|----------|--------------------|--------------------------------------------------------------------------------------------------------------------------------------------------------------------------------------------------------------------------------------------------------------------------------------------------------------------------------------------------------------------------------------------------------------------|----------------------------------------------------------------|----|
| 11 | 7.82 | C <sub>26</sub> H <sub>28</sub> O <sub>14</sub> | 565.1550 | [M+H] <sup>+</sup>                | 565.1548 (100, C <sub>26</sub> H <sub>29</sub> O <sub>14</sub> )<br>547.1442 (28.2, C <sub>26</sub> H <sub>27</sub> O <sub>13</sub> )<br>433.1128 (29.1, C <sub>21</sub> H <sub>21</sub> O <sub>10</sub> )<br>415.1024 (4.4, C <sub>21</sub> H <sub>19</sub> O <sub>9</sub> )<br>313.0703 (3.1, C <sub>17</sub> H <sub>13</sub> O <sub>6</sub> ) | 565.1548 (100, C <sub>26</sub> H <sub>29</sub> O <sub>14</sub> )<br>547.1443 (33.0, C <sub>26</sub> H <sub>27</sub> O <sub>13</sub> )<br>397.0910 (56.1, C <sub>21</sub> H <sub>17</sub> O <sub>8</sub> )<br>379.0808 (34.7, C <sub>21</sub> H <sub>15</sub> O <sub>7</sub> )<br>337.0703 (18.4, C <sub>19</sub> H <sub>13</sub> O <sub>6</sub> )<br>325.0703 (22.8, C <sub>18</sub> H <sub>13</sub> O <sub>6</sub> )<br>283.0600 (3.4, C <sub>16</sub> H <sub>11</sub> O <sub>5</sub> )                                                                                                                                                                                                                                                                               | 563.1408 | [M-H] <sup>-</sup> | 563.1407 (66.1, C <sub>26</sub> H <sub>27</sub> O <sub>14</sub> )<br>473.1092 (5.0, C <sub>23</sub> H <sub>2</sub> O <sub>11</sub> )<br>443.0984 (14.1, C <sub>19</sub> H <sub>13</sub> O <sub>7</sub> )<br>353.0667 (5.4, C <sub>18</sub> H <sub>13</sub> O <sub>7</sub> )<br>311.0565 (100, C <sub>17</sub> H <sub>11</sub> O <sub>6</sub> )<br>283.0615 (24.4, C <sub>16</sub> H <sub>11</sub> O <sub>5</sub> ) | 3'-Hydroxypuerarin<br>apioside                                 | PU |
| 12 | 7.96 | C <sub>29</sub> H <sub>34</sub> O <sub>14</sub> | 607.2022 | [M+H] <sup>+</sup>                | 571.1796 (1.7, C <sub>29</sub> H <sub>31</sub> O <sub>12</sub> )<br>461.1437 (100, C <sub>23</sub> H <sub>25</sub> O <sub>10</sub> )<br>299.0912 (65.4, C <sub>17</sub> H <sub>15</sub> O <sub>5</sub> )<br>205.0493 (0.7, C <sub>11</sub> H <sub>9</sub> O <sub>4</sub> )<br>107.0493 (1.9, C <sub>7</sub> H <sub>7</sub> O)                    | 461.1436 (46.9, C <sub>23</sub> H <sub>25</sub> O <sub>10</sub> )<br>299.0912 (66.0, C <sub>17</sub> H <sub>15</sub> O <sub>5</sub> )<br>281.0807 (11.8, C <sub>17</sub> H <sub>13</sub> O <sub>4</sub> )<br>253.0855 (11.8, C <sub>16</sub> H <sub>13</sub> O <sub>3</sub> )<br>239.0700 (8.6, C <sub>15</sub> H <sub>11</sub> O <sub>3</sub> )<br>107.0495 (100, C <sub>7</sub> H <sub>7</sub> O)                                                                                                                                                                                                                                                                                                                                                                    | 605.1884 | [M-H] <sup>-</sup> | 297.0769 (100, C <sub>17</sub> H <sub>13</sub> O <sub>5</sub> )<br>253.0871 (92.2, C <sub>16</sub> H <sub>13</sub> O <sub>3</sub> )                                                                                                                                                                                                                                                                                | Pueroside A                                                    | PU |
| 13 | 8.50 | C <sub>21</sub> H <sub>22</sub> O <sub>9</sub>  | 436.1597 | [M+NH <sub>4</sub> ] <sup>+</sup> | 419.1331 (4.0, C <sub>21</sub> H <sub>23</sub> O <sub>9</sub> )<br>257.0806 (100, C <sub>15</sub> H <sub>13</sub> O <sub>4</sub> )<br>145.0495 (1.2, C <sub>6</sub> H <sub>9</sub> O <sub>4</sub> )<br>137.0233 (2.7, C <sub>7</sub> H <sub>5</sub> O <sub>3</sub> )                                                                             | 257.0806 (100, C <sub>15</sub> H <sub>13</sub> O <sub>4</sub> )<br>239.0698 (1.1, C <sub>15</sub> H <sub>11</sub> O <sub>3</sub> )<br>147.0440 (3.5, C <sub>9</sub> H <sub>7</sub> O <sub>2</sub> )<br>137.0233 (8.1, C <sub>7</sub> H <sub>5</sub> O <sub>3</sub> )<br>97.0289 (1.1, C <sub>5</sub> H <sub>6</sub> O <sub>2</sub> )                                                                                                                                                                                                                                                                                                                                                                                                                                   | 417.1187 | [M-H] <sup>-</sup> | 255.0665 (100, C <sub>15</sub> H <sub>11</sub> O <sub>4</sub> )<br>135.0087 (35.1, C <sub>7</sub> H <sub>3</sub> O <sub>3</sub> )<br>119.0501 (18.1, C <sub>8</sub> H <sub>7</sub> O)                                                                                                                                                                                                                              | Liquiritin                                                     | G  |
| 14 | 9.43 | C <sub>27</sub> H <sub>30</sub> O <sub>13</sub> | 563.1760 | [M+H] <sup>+</sup>                | 563.1751 (100, C <sub>27</sub> H <sub>31</sub> O <sub>13</sub> )<br>431.1332 (4.9, C <sub>22</sub> H <sub>23</sub> O <sub>9</sub> )<br>413.1228 (0.5, C <sub>22</sub> H <sub>21</sub> O <sub>8</sub> )<br>311.0923 (0.4, C <sub>18</sub> H <sub>15</sub> O <sub>5</sub> )                                                                        | 563.1752 (100, C <sub>27</sub> H <sub>31</sub> O <sub>13</sub> )<br>431.1333 (57.2, C <sub>22</sub> H <sub>23</sub> O <sub>9</sub> )<br>413.1226 (32.0, C <sub>22</sub> H <sub>21</sub> O <sub>8</sub> )<br>395.1122 (22.3, C <sub>22</sub> H <sub>19</sub> O <sub>7</sub> )<br>377.1013 (10.7, C <sub>22</sub> H <sub>17</sub> O <sub>6</sub> )<br>365.1016 (13.3, C <sub>21</sub> H <sub>17</sub> O <sub>6</sub> )<br>349.1064 (5.9, C <sub>21</sub> H <sub>17</sub> O <sub>5</sub> )<br>335.0910 (15.5, C <sub>20</sub> H <sub>15</sub> O <sub>5</sub> )<br>321.1117 (4.8, C <sub>20</sub> H <sub>17</sub> O <sub>4</sub> )<br>311.0911 (71.3, C <sub>18</sub> H <sub>15</sub> O <sub>5</sub> )<br>281.0808 (15.4, C <sub>17</sub> H <sub>13</sub> O <sub>4</sub> ) | 561.1619 | [M-H] <sup>-</sup> | 309.0770 (100, C <sub>18</sub> H <sub>13</sub> O <sub>5</sub> )<br>281.0820 (29.7, C <sub>17</sub> H <sub>13</sub> O <sub>4</sub> )                                                                                                                                                                                                                                                                                | formononetin 8-C-[β-D-apiofuranosyl-(1→6)]-β-D-glucopyranoside | PU |

|    |       |                                                 |          |                    |                                                                                                                                                                                                                                                                                                                                                                                                                                                                                                                                                                                                                                                                                                                                                                                                                                                                                                                                        |                                                                                                                                                                                                                                                                                                                                                                                                                                                                                                                                                                                                                                                                                                                                                                                                  |          |                       |                                                                                                                                                                                                                                          |                  |          |
|----|-------|-------------------------------------------------|----------|--------------------|----------------------------------------------------------------------------------------------------------------------------------------------------------------------------------------------------------------------------------------------------------------------------------------------------------------------------------------------------------------------------------------------------------------------------------------------------------------------------------------------------------------------------------------------------------------------------------------------------------------------------------------------------------------------------------------------------------------------------------------------------------------------------------------------------------------------------------------------------------------------------------------------------------------------------------------|--------------------------------------------------------------------------------------------------------------------------------------------------------------------------------------------------------------------------------------------------------------------------------------------------------------------------------------------------------------------------------------------------------------------------------------------------------------------------------------------------------------------------------------------------------------------------------------------------------------------------------------------------------------------------------------------------------------------------------------------------------------------------------------------------|----------|-----------------------|------------------------------------------------------------------------------------------------------------------------------------------------------------------------------------------------------------------------------------------|------------------|----------|
| 15 | 10.38 | C <sub>23</sub> H <sub>28</sub> O <sub>11</sub> | 481.1704 | [M+H] <sup>+</sup> | 319.11743 (32.2, C <sub>17</sub> H <sub>19</sub> O <sub>6</sub> )<br>301.1070 (7.0, C <sub>17</sub> H <sub>17</sub> O <sub>5</sub> )<br>285.1126 (0.6, C <sub>17</sub> H <sub>17</sub> O <sub>4</sub> )<br>267.0864 (3.1, C <sub>13</sub> H <sub>15</sub> O <sub>6</sub> )<br>257.1378 (1.5, C <sub>13</sub> H <sub>21</sub> O <sub>15</sub> )<br>249.0751 (0.8, C <sub>13</sub> H <sub>13</sub> O <sub>5</sub> )<br>215.0910 (0.9, C <sub>10</sub> H <sub>15</sub> O <sub>5</sub> )<br>197.0808 (100, C <sub>10</sub> H <sub>13</sub> O <sub>4</sub> )<br>179.0701 (1.8, C <sub>10</sub> H <sub>11</sub> O <sub>3</sub> )<br>161.0597 (0.6, C <sub>10</sub> H <sub>9</sub> O <sub>2</sub> )<br>151.0753 (1.6, C <sub>9</sub> H <sub>11</sub> O <sub>2</sub> )<br>145.0495 (0.7, C <sub>6</sub> H <sub>9</sub> O <sub>4</sub> )<br>133.0650 (0.4, C <sub>9</sub> H <sub>9</sub> O)<br>105.0339 (10.3, C <sub>7</sub> H <sub>5</sub> O) | 319.1173 (18.9, C <sub>17</sub> H <sub>19</sub> O <sub>6</sub> )<br>197.0808 (100, C <sub>10</sub> H <sub>13</sub> O <sub>4</sub> )<br>179.0702 (29.6, C <sub>10</sub> H <sub>11</sub> O <sub>3</sub> )<br>161.0596 (14.0, C <sub>10</sub> H <sub>9</sub> O <sub>2</sub> )<br>151.0753 (14.0, C <sub>9</sub> H <sub>11</sub> O <sub>2</sub> )<br>133.0648 (27.9, C <sub>6</sub> H <sub>9</sub> O)<br>105.0338 (71.4, C <sub>7</sub> H <sub>5</sub> O)                                                                                                                                                                                                                                                                                                                                            | 525.1616 | [M+HCOO] <sup>-</sup> | 479.1563 (13.4, C <sub>23</sub> H <sub>27</sub> O <sub>11</sub> )<br>121.0294 (100, C <sub>7</sub> H <sub>6</sub> O <sub>2</sub> )                                                                                                       | 4-epi-albiflorin | PA       |
| 16 | 11.19 | C <sub>24</sub> H <sub>26</sub> O <sub>10</sub> | 475.1598 | [M+H] <sup>+</sup> | 313.1067 (100, C <sub>18</sub> H <sub>17</sub> O <sub>5</sub> )<br>295.0968 (1.3, C <sub>18</sub> H <sub>15</sub> O <sub>4</sub> )<br>267.1026 (0.1, C <sub>17</sub> H <sub>15</sub> O <sub>3</sub> )<br>253.0864 (0.2, C <sub>16</sub> H <sub>13</sub> O <sub>3</sub> )<br>219.0650 (4.2, C <sub>12</sub> H <sub>11</sub> O <sub>4</sub> )<br>207.0651 (0.8, C <sub>11</sub> H <sub>11</sub> O <sub>4</sub> )<br>145.0496 (0.8, C <sub>6</sub> H <sub>9</sub> O <sub>4</sub> )<br>107.0495 (14.1, C <sub>7</sub> H <sub>7</sub> O)                                                                                                                                                                                                                                                                                                                                                                                                    | 313.1066 (64.2, C <sub>18</sub> H <sub>17</sub> O <sub>5</sub> )<br>295.0963 (10.3, C <sub>18</sub> H <sub>15</sub> O <sub>4</sub> )<br>267.1014 (12.7, C <sub>17</sub> H <sub>15</sub> O <sub>3</sub> )<br>253.0857 (7.3, C <sub>16</sub> H <sub>13</sub> O <sub>3</sub> )<br>219.0650 (6.9, C <sub>12</sub> H <sub>11</sub> O <sub>4</sub> )<br>207.0651 (6.5, C <sub>11</sub> H <sub>11</sub> O <sub>4</sub> )<br>189.0546 (1.8, C <sub>11</sub> H <sub>9</sub> O <sub>3</sub> )<br>175.0754 (2.6, C <sub>11</sub> H <sub>11</sub> O <sub>2</sub> )<br>161.0596 (1.0, C <sub>10</sub> H <sub>9</sub> O <sub>2</sub> )<br>145.0646 (2.0, C <sub>10</sub> H <sub>9</sub> O)<br>127.0391 (2.3, C <sub>6</sub> H <sub>7</sub> O <sub>3</sub> )<br>107.0495 (100, C <sub>7</sub> H <sub>7</sub> O) | 519.1508 | [M+HCOO] <sup>-</sup> | 473.1453 (2.5, C <sub>24</sub> H <sub>25</sub> O <sub>10</sub> )<br>311.0927 (100, C <sub>18</sub> H <sub>15</sub> O <sub>5</sub> )<br>267.1021 (62.5, C <sub>17</sub> H <sub>15</sub> O <sub>3</sub> )                                  | Sophoraside A    | PU       |
| 17 | 11.60 | C <sub>22</sub> H <sub>22</sub> O <sub>9</sub>  | 431.1334 | [M+H] <sup>+</sup> | 269.0806 (100, C <sub>16</sub> H <sub>13</sub> O <sub>4</sub> )                                                                                                                                                                                                                                                                                                                                                                                                                                                                                                                                                                                                                                                                                                                                                                                                                                                                        | 269.0807 (100, C <sub>16</sub> H <sub>13</sub> O <sub>4</sub> )                                                                                                                                                                                                                                                                                                                                                                                                                                                                                                                                                                                                                                                                                                                                  | 475.1247 | [M+HCOO] <sup>-</sup> | 267.0665 (100, C <sub>16</sub> H <sub>11</sub> O <sub>4</sub> )                                                                                                                                                                          | Ononin           | PU,<br>G |
| 18 | 11.88 | C <sub>21</sub> H <sub>22</sub> O <sub>9</sub>  | 419.1333 | [M+H] <sup>+</sup> | 257.0806 (100, C <sub>15</sub> H <sub>13</sub> O <sub>4</sub> )<br>137.0233 (0.4, C <sub>7</sub> H <sub>5</sub> O <sub>3</sub> )                                                                                                                                                                                                                                                                                                                                                                                                                                                                                                                                                                                                                                                                                                                                                                                                       | 257.0806 (100, C <sub>15</sub> H <sub>13</sub> O <sub>4</sub> )<br>147.0440 (7.4, C <sub>9</sub> H <sub>7</sub> O <sub>2</sub> )<br>137.0233 (12.7, C <sub>7</sub> H <sub>5</sub> O <sub>3</sub> )                                                                                                                                                                                                                                                                                                                                                                                                                                                                                                                                                                                               | 417.1192 | [M-H] <sup>-</sup>    | 255.0664 (100, C <sub>15</sub> H <sub>11</sub> O <sub>4</sub> )<br>135.0088 (30.1, C <sub>7</sub> H <sub>3</sub> O <sub>3</sub> )<br>119.0501 (11.6, C <sub>8</sub> H <sub>7</sub> O)                                                    | Isoliquiritin    | G        |
| 19 | 12.47 | C <sub>15</sub> H <sub>10</sub> O <sub>4</sub>  | 255.0649 | [M+H] <sup>+</sup> | 255.0649 (100, C <sub>15</sub> H <sub>11</sub> O <sub>4</sub> )                                                                                                                                                                                                                                                                                                                                                                                                                                                                                                                                                                                                                                                                                                                                                                                                                                                                        | 255.0650 (100, C <sub>15</sub> H <sub>11</sub> O <sub>4</sub> )                                                                                                                                                                                                                                                                                                                                                                                                                                                                                                                                                                                                                                                                                                                                  | 253.0506 | [M-H] <sup>-</sup>    | 253.0506 (100, C <sub>15</sub> H <sub>9</sub> O <sub>4</sub> )                                                                                                                                                                           | Daidzein         | PU<br>G  |
| 20 | 12.71 | C <sub>15</sub> H <sub>12</sub> O <sub>4</sub>  | 257.0807 | [M+H] <sup>+</sup> | 257.0805 (100, C <sub>15</sub> H <sub>13</sub> O <sub>4</sub> )<br>239.0703 (1.5, C <sub>15</sub> H <sub>11</sub> O <sub>3</sub> )<br>211.0755 (0.3, C <sub>14</sub> H <sub>11</sub> O <sub>2</sub> )<br>147.0439 (3.2, C <sub>9</sub> H <sub>7</sub> O <sub>2</sub> )<br>137.0233 (4.6, C <sub>7</sub> H <sub>5</sub> O <sub>3</sub> )                                                                                                                                                                                                                                                                                                                                                                                                                                                                                                                                                                                                | 257.0806 (100, C <sub>15</sub> H <sub>13</sub> O <sub>4</sub> )<br>211.0753 (3.2, C <sub>14</sub> H <sub>11</sub> O <sub>2</sub> )<br>163.0389 (1.6, C <sub>9</sub> H <sub>7</sub> O <sub>3</sub> )<br>147.0440 (19.3, C <sub>9</sub> H <sub>7</sub> O <sub>2</sub> )<br>137.0233 (35.9, C <sub>7</sub> H <sub>5</sub> O <sub>3</sub> )                                                                                                                                                                                                                                                                                                                                                                                                                                                          | 255.1663 | [M-H] <sup>-</sup>    | 255.0665 (90.9, C <sub>15</sub> H <sub>11</sub> O <sub>4</sub> )<br>135.0088 (90.2, C <sub>7</sub> H <sub>3</sub> O <sub>3</sub> )<br>119.0502 (100, C <sub>8</sub> H <sub>7</sub> O)<br>91.0189 (11.3, C <sub>6</sub> H <sub>3</sub> O) | Liquiritigenin   | G        |
| 21 | 12.99 | C <sub>16</sub> H <sub>12</sub> O <sub>5</sub>  | 285.0754 | [M+H] <sup>+</sup> |                                                                                                                                                                                                                                                                                                                                                                                                                                                                                                                                                                                                                                                                                                                                                                                                                                                                                                                                        | 285.0755 (100, C <sub>16</sub> H <sub>13</sub> O <sub>5</sub> ) <sup>a</sup>                                                                                                                                                                                                                                                                                                                                                                                                                                                                                                                                                                                                                                                                                                                     | 283.0612 | [M-H] <sup>-</sup>    | 283.0613 (100, C <sub>16</sub> H <sub>11</sub> O <sub>5</sub> )                                                                                                                                                                          | Glycitein        | PU       |

|    |       |                                                 |          |                                   |                                                                                                                                                                                                                                                                                                                                                                                                                                                                                                                                                                                                                                                                                                                                                     |                                                                                                                                                                                                                                                                                                                                                                                                                                                                                                                                                                                                                                                                                                                                                                           |          |                       |                                                                                                                                                                                                                                                                                                                                                                                                                                                                                                                                                                                                                         |                                 |    |
|----|-------|-------------------------------------------------|----------|-----------------------------------|-----------------------------------------------------------------------------------------------------------------------------------------------------------------------------------------------------------------------------------------------------------------------------------------------------------------------------------------------------------------------------------------------------------------------------------------------------------------------------------------------------------------------------------------------------------------------------------------------------------------------------------------------------------------------------------------------------------------------------------------------------|---------------------------------------------------------------------------------------------------------------------------------------------------------------------------------------------------------------------------------------------------------------------------------------------------------------------------------------------------------------------------------------------------------------------------------------------------------------------------------------------------------------------------------------------------------------------------------------------------------------------------------------------------------------------------------------------------------------------------------------------------------------------------|----------|-----------------------|-------------------------------------------------------------------------------------------------------------------------------------------------------------------------------------------------------------------------------------------------------------------------------------------------------------------------------------------------------------------------------------------------------------------------------------------------------------------------------------------------------------------------------------------------------------------------------------------------------------------------|---------------------------------|----|
| 22 | 14.86 | C <sub>30</sub> H <sub>32</sub> O <sub>12</sub> | 602.2230 | [M+NH <sub>4</sub> ] <sup>+</sup> | 567.1841 (7.1, C <sub>30</sub> H <sub>31</sub> O <sub>11</sub> )<br>463.1586 (3.1, C <sub>23</sub> H <sub>27</sub> O <sub>10</sub> )<br>445.1489 (22.3, C <sub>23</sub> H <sub>25</sub> O <sub>9</sub> )<br>427.1385 (23.1, C <sub>23</sub> H <sub>23</sub> O <sub>8</sub> )<br>301.1068 (18.5, C <sub>17</sub> H <sub>17</sub> O <sub>5</sub> )<br>267.0863 (93.9, C <sub>13</sub> H <sub>15</sub> O <sub>6</sub> )<br>249.0755 (28.4, C <sub>13</sub> H <sub>13</sub> O <sub>5</sub> )<br>197.0809 (1.8, C <sub>10</sub> H <sub>13</sub> O <sub>4</sub> )<br>179.0702 (100, C <sub>10</sub> H <sub>11</sub> O <sub>3</sub> )<br>151.0753 (1.8, C <sub>9</sub> H <sub>11</sub> O <sub>2</sub> )<br>105.0338 (3.0, C <sub>7</sub> H <sub>5</sub> O) | 267.0862 (62.7, C <sub>13</sub> H <sub>15</sub> O <sub>6</sub> )<br>249.0755 (45.3, C <sub>13</sub> H <sub>13</sub> O <sub>5</sub> )<br>179.0702 (88.6, C <sub>10</sub> H <sub>11</sub> O <sub>3</sub> )<br>151.0753 (30.6, C <sub>9</sub> H <sub>11</sub> O <sub>2</sub> )<br>105.0338 (100, C <sub>7</sub> H <sub>5</sub> O)                                                                                                                                                                                                                                                                                                                                                                                                                                            | 629.1881 | [M+HCOO] <sup>-</sup> | 583.1821 (5.6, C <sub>30</sub> H <sub>31</sub> O <sub>12</sub> )<br>121.0294 (100, C <sub>7</sub> H <sub>5</sub> O <sub>2</sub> )                                                                                                                                                                                                                                                                                                                                                                                                                                                                                       | Benzoylpaconiflorin             | PA |
| 23 | 15.20 | C <sub>30</sub> H <sub>32</sub> O <sub>12</sub> | 585.1966 | [M+H] <sup>+</sup>                | 319.1174 (100, C <sub>17</sub> H <sub>19</sub> O <sub>6</sub> )<br>301.1069 (16.1, C <sub>17</sub> H <sub>17</sub> O <sub>5</sub> )<br>267.0863 (28.7, C <sub>13</sub> H <sub>15</sub> O <sub>6</sub> )<br>249.0756 (6.4, C <sub>13</sub> H <sub>13</sub> O <sub>5</sub> )<br>197.0808 (25.3, C <sub>10</sub> H <sub>13</sub> O <sub>4</sub> )<br>151.0753 (1.5, C <sub>9</sub> H <sub>11</sub> O <sub>2</sub> )<br>105.0339 (18.6, C <sub>7</sub> H <sub>5</sub> O)                                                                                                                                                                                                                                                                                | 319.1174 (32.3, C <sub>17</sub> H <sub>19</sub> O <sub>6</sub> )<br>301.1069 (6.1, C <sub>17</sub> H <sub>17</sub> O <sub>5</sub> )<br>267.0863 (10.0, C <sub>13</sub> H <sub>15</sub> O <sub>6</sub> )<br>249.0756 (9.6, C <sub>13</sub> H <sub>13</sub> O <sub>5</sub> )<br>197.0808 (18.2, C <sub>10</sub> H <sub>13</sub> O <sub>4</sub> )<br>151.0753 (12.2, C <sub>9</sub> H <sub>11</sub> O <sub>2</sub> )<br>105.0339 (100, C <sub>7</sub> H <sub>5</sub> O)                                                                                                                                                                                                                                                                                                      | 629.1880 | [M+HCOO] <sup>-</sup> | 583.1825 (10.4, C <sub>30</sub> H <sub>31</sub> O <sub>12</sub> )<br>121.0294 (100, C <sub>7</sub> H <sub>5</sub> O <sub>2</sub> )                                                                                                                                                                                                                                                                                                                                                                                                                                                                                      | Paconivayin                     | PA |
| 24 | 15.24 | C <sub>48</sub> H <sub>72</sub> O <sub>21</sub> | 985.4637 | [M+H] <sup>+</sup>                | 985.4625 (100, C <sub>48</sub> H <sub>73</sub> O <sub>21</sub> )<br>809.4303 (13.5, C <sub>42</sub> H <sub>65</sub> O <sub>15</sub> )<br>615.3882 (26.2, C <sub>36</sub> H <sub>55</sub> O <sub>8</sub> )<br>453.3357 (14.6, C <sub>30</sub> H <sub>45</sub> O <sub>3</sub> )                                                                                                                                                                                                                                                                                                                                                                                                                                                                       | 809.4305 (7.6, C <sub>42</sub> H <sub>65</sub> O <sub>15</sub> )<br>647.3774 (3.4, C <sub>36</sub> H <sub>55</sub> O <sub>10</sub> )<br>633.3985 (2.1, C <sub>36</sub> H <sub>57</sub> O <sub>9</sub> )<br>615.3884 (30.9, C <sub>36</sub> H <sub>55</sub> O <sub>8</sub> )<br>471.3465 (8.0, C <sub>30</sub> H <sub>47</sub> O <sub>4</sub> )<br>453.3358 (100, C <sub>30</sub> H <sub>45</sub> O <sub>3</sub> )<br>435.3253 (7.4, C <sub>30</sub> H <sub>43</sub> O <sub>2</sub> )<br>407.3302 (6.3, C <sub>29</sub> H <sub>43</sub> O)<br>389.3197 (2.6, C <sub>29</sub> H <sub>41</sub> )<br>357.2418 (3.6, C <sub>23</sub> H <sub>33</sub> O <sub>3</sub> )<br>217.1586 (6.3, C <sub>15</sub> H <sub>21</sub> O)<br>189.1637 (5.7, C <sub>14</sub> H <sub>21</sub> ) | 983.4503 | [M-H] <sup>-</sup>    | 983.4498 (100, C <sub>48</sub> H <sub>71</sub> O <sub>21</sub> )<br>821.3972 (24.1, C <sub>42</sub> H <sub>61</sub> O <sub>16</sub> )<br>645.3640 (3.5, C <sub>36</sub> H <sub>53</sub> O <sub>10</sub> )<br>351.0569 (36.5, C <sub>12</sub> H <sub>15</sub> O <sub>12</sub> )<br>289.0569 (2.6, C <sub>11</sub> H <sub>13</sub> O <sub>9</sub> )<br>193.0353 (19.5, C <sub>6</sub> H <sub>9</sub> O <sub>7</sub> )<br>175.0247 (9.4, C <sub>6</sub> H <sub>7</sub> O <sub>6</sub> )<br>157.0142 (4.0, C <sub>6</sub> H <sub>5</sub> O <sub>5</sub> )<br>113.0243 (34.6, C <sub>5</sub> H <sub>5</sub> O <sub>3</sub> ) | Licorice saponin A <sub>3</sub> | G  |
| 25 | 16.09 | C <sub>44</sub> H <sub>64</sub> O <sub>18</sub> | 881.4155 | [M+H] <sup>+</sup>                | 705.3835 (91.6, C <sub>38</sub> H <sub>57</sub> O <sub>12</sub> )<br>529.3523 (2.2, C <sub>32</sub> H <sub>49</sub> O <sub>6</sub> )<br>511.3415 (100, C <sub>32</sub> H <sub>47</sub> O <sub>5</sub> )                                                                                                                                                                                                                                                                                                                                                                                                                                                                                                                                             | 705.3832 (11.7, C <sub>38</sub> H <sub>57</sub> O <sub>12</sub> )<br>529.3522 (5.1, C <sub>32</sub> H <sub>49</sub> O <sub>6</sub> )<br>511.3414 (100, C <sub>32</sub> H <sub>47</sub> O <sub>5</sub> )<br>451.3202 (5.1, C <sub>30</sub> H <sub>43</sub> O <sub>3</sub> )<br>433.3096 (2.3, C <sub>30</sub> H <sub>41</sub> O <sub>2</sub> )<br>405.3148 (3.1, C <sub>29</sub> H <sub>41</sub> O)<br>233.1536 (1.3, C <sub>15</sub> H <sub>21</sub> O <sub>2</sub> )<br>217.1585 (2.5, C <sub>15</sub> H <sub>21</sub> O)<br>215.1433 (1.3, C <sub>15</sub> H <sub>19</sub> O)<br>189.1636 (2.1, C <sub>14</sub> H <sub>21</sub> )<br>187.1481 (2.5, C <sub>14</sub> H <sub>19</sub> )                                                                                   | 879.4023 | [M-H] <sup>-</sup>    | 351.0570 (95.6, C <sub>12</sub> H <sub>15</sub> O <sub>12</sub> )<br>289.0562 (7.0, C <sub>11</sub> H <sub>13</sub> O <sub>9</sub> )<br>193.0353 (49.9, C <sub>6</sub> H <sub>9</sub> O <sub>7</sub> )<br>175.0247 (25.8, C <sub>6</sub> H <sub>7</sub> O <sub>6</sub> )<br>157.0140 (5.8, C <sub>6</sub> H <sub>5</sub> O <sub>5</sub> )<br>113.0243 (100, C <sub>5</sub> H <sub>5</sub> O <sub>3</sub> )                                                                                                                                                                                                              | 22β-acetoxglycyrrhizic acid     | G  |

|    |       |                                                 |          |                    |                                                                                                                                                                                                                                                                                                                                                   |                                                                                                                                                                                                                                                                                                                                                                                                                                                                                                                                                                                                                                                                                                      |          |                    |                                                                                                                                                                                                                                                                                                                                                                                                                                                                                 |                                 |   |
|----|-------|-------------------------------------------------|----------|--------------------|---------------------------------------------------------------------------------------------------------------------------------------------------------------------------------------------------------------------------------------------------------------------------------------------------------------------------------------------------|------------------------------------------------------------------------------------------------------------------------------------------------------------------------------------------------------------------------------------------------------------------------------------------------------------------------------------------------------------------------------------------------------------------------------------------------------------------------------------------------------------------------------------------------------------------------------------------------------------------------------------------------------------------------------------------------------|----------|--------------------|---------------------------------------------------------------------------------------------------------------------------------------------------------------------------------------------------------------------------------------------------------------------------------------------------------------------------------------------------------------------------------------------------------------------------------------------------------------------------------|---------------------------------|---|
| 26 | 17.08 | C <sub>42</sub> H <sub>62</sub> O <sub>17</sub> | 839.4055 | [M+H] <sup>+</sup> | 663.3727 (21.4, C <sub>36</sub> H <sub>55</sub> O <sub>11</sub> )<br>645.3621 (12.9, C <sub>36</sub> H <sub>53</sub> O <sub>10</sub> )<br>487.3414 (81.2, C <sub>30</sub> H <sub>47</sub> O <sub>5</sub> )<br>469.3309 (100, C <sub>30</sub> H <sub>45</sub> O <sub>4</sub> )<br>451.3203 (12.5, C <sub>30</sub> H <sub>43</sub> O <sub>3</sub> ) | 645.3633 (5.7, C <sub>36</sub> H <sub>53</sub> O <sub>10</sub> )<br>487.3415 (54.5, C <sub>36</sub> H <sub>53</sub> O <sub>10</sub> )<br>469.3311 (100, C <sub>30</sub> H <sub>45</sub> O <sub>4</sub> )<br>451.3203 (23.5, C <sub>30</sub> H <sub>43</sub> O <sub>3</sub> )<br>439.3205 (4.8, C <sub>29</sub> H <sub>43</sub> O <sub>3</sub> )<br>217.1581 (2.5, C <sub>15</sub> H <sub>21</sub> O)<br>205.1588 (1.4, C <sub>14</sub> H <sub>21</sub> O)<br>189.1637 (4.5, C <sub>14</sub> H <sub>21</sub> )<br>175.1482 (3.9, C <sub>13</sub> H <sub>19</sub> )<br>159.0287 (7.2, C <sub>6</sub> H <sub>7</sub> O <sub>5</sub> )<br>141.0181 (20.2, C <sub>6</sub> H <sub>5</sub> O <sub>4</sub> ) | 837.3918 | [M-H] <sup>-</sup> | 837.3921 (100, C <sub>42</sub> H <sub>61</sub> O <sub>17</sub> )<br>351.0571 (65.6, C <sub>12</sub> H <sub>15</sub> O <sub>12</sub> )<br>289.0564 (4.2, C <sub>11</sub> H <sub>13</sub> O <sub>9</sub> )<br>193.0353 (39.6, C <sub>6</sub> H <sub>9</sub> O <sub>7</sub> )<br>175.0248 (17.2, C <sub>6</sub> H <sub>7</sub> O <sub>6</sub> )<br>157.0141 (4.8, C <sub>6</sub> H <sub>5</sub> O <sub>5</sub> )<br>113.0244 (65.4, C <sub>5</sub> H <sub>5</sub> O <sub>3</sub> ) | Licorice saponin G <sub>2</sub> | G |
| 27 | 17.77 | C <sub>42</sub> H <sub>62</sub> O <sub>16</sub> | 823.4097 | [M+H] <sup>+</sup> | 647.3777 (31.0, C <sub>36</sub> H <sub>55</sub> O <sub>10</sub> )<br>471.3463 (5.4, C <sub>30</sub> H <sub>47</sub> O <sub>4</sub> )<br>453.3356 (100, C <sub>30</sub> H <sub>45</sub> O <sub>3</sub> )                                                                                                                                           | 647.3784 (13.8, C <sub>36</sub> H <sub>55</sub> O <sub>10</sub> )<br>471.3468 (6.0, C <sub>30</sub> H <sub>47</sub> O <sub>4</sub> )<br>453.3359 (100, C <sub>30</sub> H <sub>45</sub> O <sub>3</sub> )<br>407.3302 (3.2, C <sub>29</sub> H <sub>43</sub> O)<br>217.1587 (3.2, C <sub>15</sub> H <sub>21</sub> O)<br>189.1638 (3.3, C <sub>14</sub> H <sub>21</sub> )                                                                                                                                                                                                                                                                                                                                | 821.3966 | [M-H] <sup>-</sup> | 821.3975 (100, C <sub>42</sub> H <sub>61</sub> O <sub>16</sub> )<br>351.0572 (65.6, C <sub>12</sub> H <sub>15</sub> O <sub>12</sub> )<br>193.0353 (39.6, C <sub>6</sub> H <sub>9</sub> O <sub>7</sub> )<br>175.0248 (17.02, C <sub>6</sub> H <sub>7</sub> O <sub>6</sub> )<br>157.0141 (4.8, C <sub>6</sub> H <sub>5</sub> O <sub>5</sub> )<br>113.0244 (65.4, C <sub>5</sub> H <sub>5</sub> O <sub>3</sub> )                                                                   | Glycyrrhizin                    | G |

PU: PUERARIAE RADIX (*Pueraria lobata*)

E: EPHEDRAE HERBA (*Ephedra sinica*; *Ephedra intermedia*; *Ephedra equisetina*)

PA: PAEONIAE RADIX (*Paenonia lactiflora*)

G: GLYCYRRHIZAE RADIX (*Glycyrrhiza uralensis*; *Glycyrrhiza glabra*)

<sup>a</sup> Normalized collision energy at 30 eV

**Table S2.** Mass spectrometric data of products detected in Kakkonto extract reacted with glyceraldehyde (GA).

| No.        | $t_R$ (min) | Molecular formula  | Positive ion mode       |           | MS/MS (30 eV)                                         |
|------------|-------------|--------------------|-------------------------|-----------|-------------------------------------------------------|
|            |             |                    | Detected mass ( $m/z$ ) |           | Detected mass $m/z$<br>(Intensity, molecular formula) |
| <b>EM1</b> | 1.80        | $C_{12}H_{18}O_3N$ | 224.1281                | $[M+H]^+$ | 206.1174 (100.0, $C_{12}H_{16}O_2N$ )                 |
|            |             |                    |                         |           | 188.1068 (6.6, $C_{12}H_{14}ON$ )                     |
|            |             |                    |                         |           | 170.0962 (5.2, $C_{12}H_{12}N$ )                      |
|            |             |                    |                         |           | 158.0962 (5.5, $C_{11}H_{12}N$ )                      |
|            |             |                    |                         |           | 134.0963 (5.2, $C_9H_{12}N$ )                         |
|            |             |                    |                         |           | 117.0699 (0.6, $C_9H_9$ )                             |
| <b>EM2</b> | 2.42        | $C_{12}H_{18}O_3N$ | 224.1280                | $[M+H]^+$ | 206.1174 (100.0, $C_{12}H_{16}O_2N$ )                 |
|            |             |                    |                         |           | 188.1068 (1.0, $C_{12}H_{14}ON$ )                     |
|            |             |                    |                         |           | 135.0804 (11.4, $C_9H_{11}O$ )                        |
|            |             |                    |                         |           | 117.0700 (4.5, $C_9H_9$ )                             |
| <b>EM3</b> | 2.60        | $C_{13}H_{20}O_3N$ | 238.1438                | $[M+H]^+$ | 220.1330 (100.0, $C_{13}H_{18}O_2N$ )                 |
|            |             |                    |                         |           | 202.1226 (3.0, $C_{13}H_{16}ON$ )                     |
|            |             |                    |                         |           | 184.1119 (0.9, $C_{13}H_{14}N$ )                      |
|            |             |                    |                         |           | 172.1119 (1.4, $C_{12}H_{14}N$ )                      |
|            |             |                    |                         |           | 148.1120 (21.3, $C_{10}H_{14}N$ )                     |
|            |             |                    |                         |           | 135.0803 (0.6, $C_9H_{11}O$ )                         |
|            |             |                    |                         |           | 117.0702 (0.4, $C_9H_9$ )                             |
|            |             |                    |                         |           | 114.0915 (0.8, $C_6H_{12}ON$ )                        |
|            |             |                    |                         |           | 104.0709 (4.3, $C_4H_{10}O_2N$ )                      |

**Table S3.** Mass spectrometric data of products detected in Kakkonto extract reacted with methylglyoxal (MGO).

| No.        | $t_R$ (min) | Molecular formula  | Positive ion mode   |           | MS/MS (30 eV)                                         |
|------------|-------------|--------------------|---------------------|-----------|-------------------------------------------------------|
|            |             |                    | Detected mass $m/z$ |           | Detected mass $m/z$<br>(Intensity, molecular formula) |
| <b>EM4</b> | 3.07        | $C_{13}H_{19}O_3N$ | 238.1436            | $[M+H]^+$ | 220.1330 (49.2, $C_{13}H_{18}O_2N$ )                  |
|            |             |                    |                     |           | 202.1226 (0.6, $C_{13}H_{16}ON$ )                     |
|            |             |                    |                     |           | 192.1381 (2.5, $C_{12}H_{18}ON$ )                     |
|            |             |                    |                     |           | 174.1274 (0.8, $C_{12}H_{16}N$ )                      |
|            |             |                    |                     |           | 135.0804 (17.2, $C_9H_{11}O$ )                        |
|            |             |                    |                     |           | 117.0700 (4.6, $C_9H_9$ )                             |
|            |             |                    |                     |           | 104.0709 (100.0, $C_4H_{10}O_2N$ )                    |
| <b>EM5</b> | 3.59        | $C_{13}H_{19}O_3N$ | 238.1436            | $[M+H]^+$ | 220.1329 (68.3, $C_{13}H_{18}O_2N$ )                  |
|            |             |                    |                     |           | 202.1223 (0.7, $C_{13}H_{16}ON$ )                     |
|            |             |                    |                     |           | 192.1380 (3.8, $C_{12}H_{18}ON$ )                     |
|            |             |                    |                     |           | 174.1276 (0.9, $C_{12}H_{16}N$ )                      |
|            |             |                    |                     |           | 135.0803 (18.6, $C_9H_{11}O$ )                        |
|            |             |                    |                     |           | 117.0700 (5.7, $C_9H_9$ )                             |
|            |             |                    |                     |           | 104.0709 (100, $C_4H_{10}O_2N$ )                      |
